# Supplementary material for: Bacterial cellulose nanoparticles as a sustainable drug delivery platform for protein-based therapeutics
Source: Royal Society of Chemistry journal article supplement (doi:10.1039/d3lp00184a), 2023-12-13
Supplement: d3lp00184a1.pdf [file d3lp00184a1.pdf]

## Supplemental Information

### Bacterial cellulose nanoparticles as a sustainable drug delivery platform for protein-based therapeutics

Gabrielle N. Balistreri<sup>1,3</sup>, Ian R. Campbell<sup>2</sup>, Xinqi Li<sup>2</sup>, Julia Amorim<sup>5</sup>, Shuai Zhang<sup>1,2,4</sup>, Elizabeth Nance<sup>1,3</sup>, Eleftheria Roumeli<sup>1,2\*</sup>

<sup>1</sup>Molecular Engineering & Sciences Institute, University of Washington, Seattle, WA 98195, USA

<sup>2</sup>Department of Materials Science and Engineering, University of Washington, Seattle WA 98195

<sup>3</sup>Department of Chemical Engineering, University of Washington, Seattle WA 98195

<sup>4</sup>Physical Sciences Division, Pacific Northwest National Laboratory, Richland, WA99354

<sup>5</sup>Department of Biotechnology, Federal Rural University of Pernambuco, Recife PE, Brazil 52171-900

\*Corresponding author: [eroumeli@uw.edu](mailto:eroumeli@uw.edu) (E.R.)

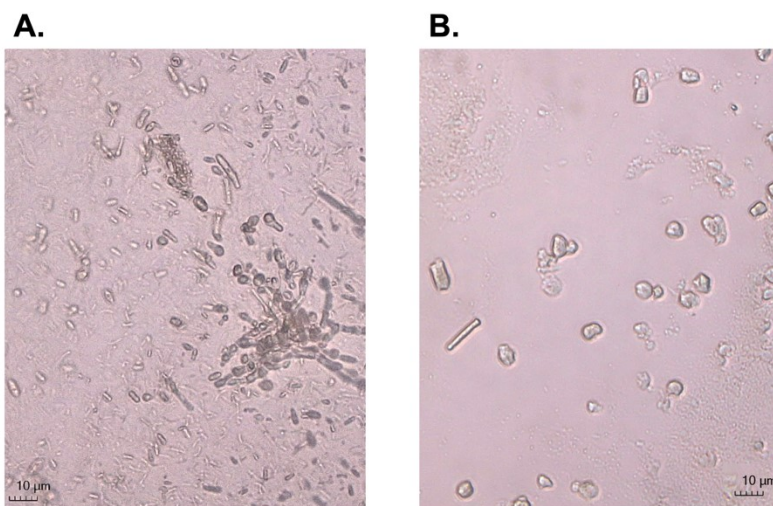

Figure S1. Microbial co-cultures in SCOBY starter kit: (A) in pellicle and (B) in liquid. Higher density of microbial cells in pellicles, yet still exhibited in liquid. Scale bars: 10 µm.

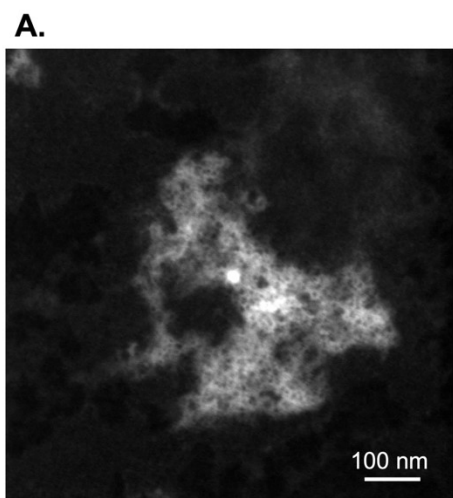

Figure S2. STEM image of BCNPs at 100 nm to show the distribution of particle morphology. Scale bar: 100 nm.

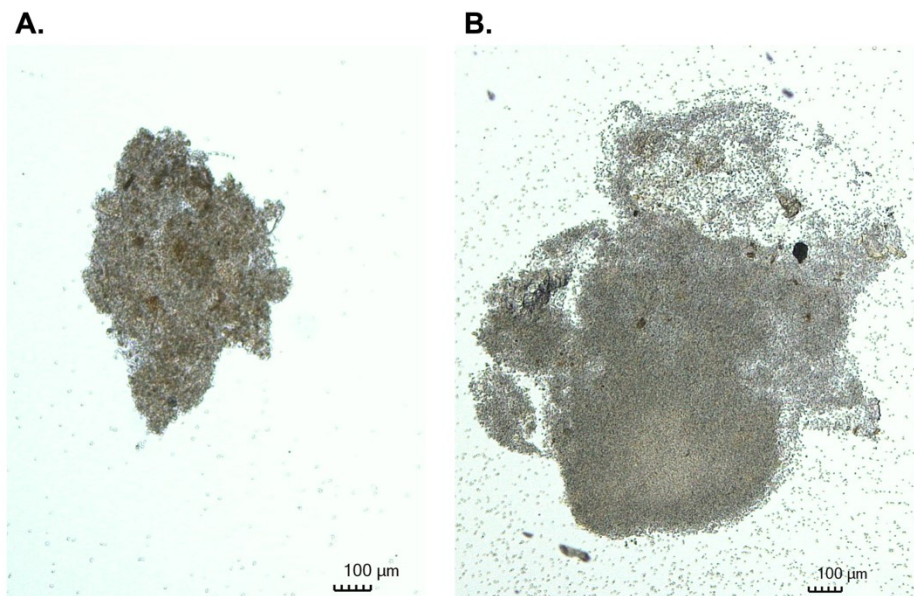

Figure S3. Light microscope images at a 5x optical setting for BC microparticles grown for: (A) 3 days and (B) 5 days. Increased particle size at 5 days of growth compared to 3 days. Scale bars: 100  $\mu\text{m}$ .

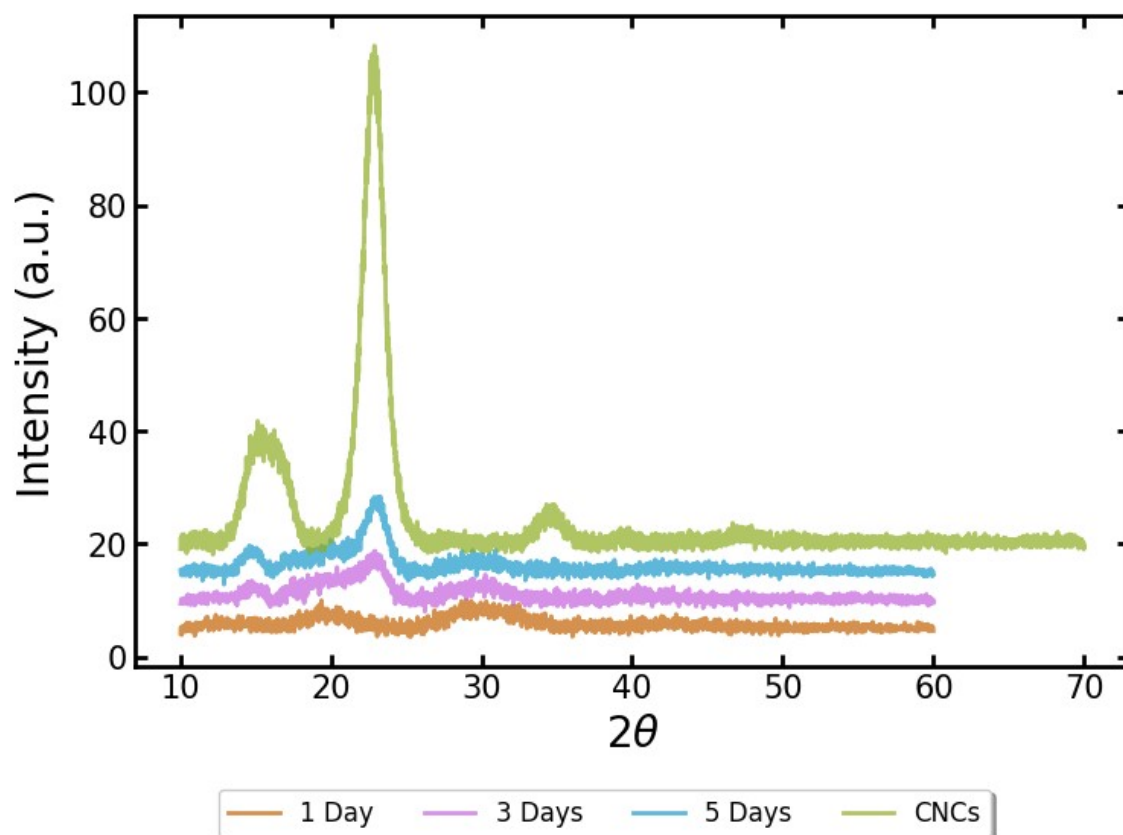

Figure S4. XRD spectra of BC grown for 1-day, 3-day, and 5-day timepoints and in comparison, to cellulose nanocrystals (CNCs). Qualitatively shows increase in crystallinity overtime of growth.

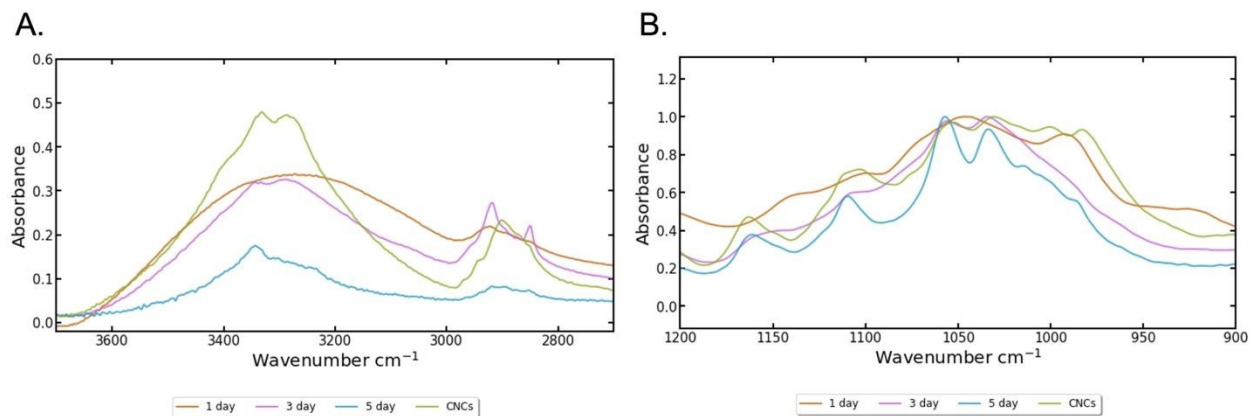

Figure S5. Closer look at FTIR spectra of BC grown for 1-day, 3-day, and 5-day timepoints and CNCs: (A) Wavenumber range 3600-2800  $\text{cm}^{-1}$  and (B) Wavenumber range 1200-900  $\text{cm}^{-1}$ .

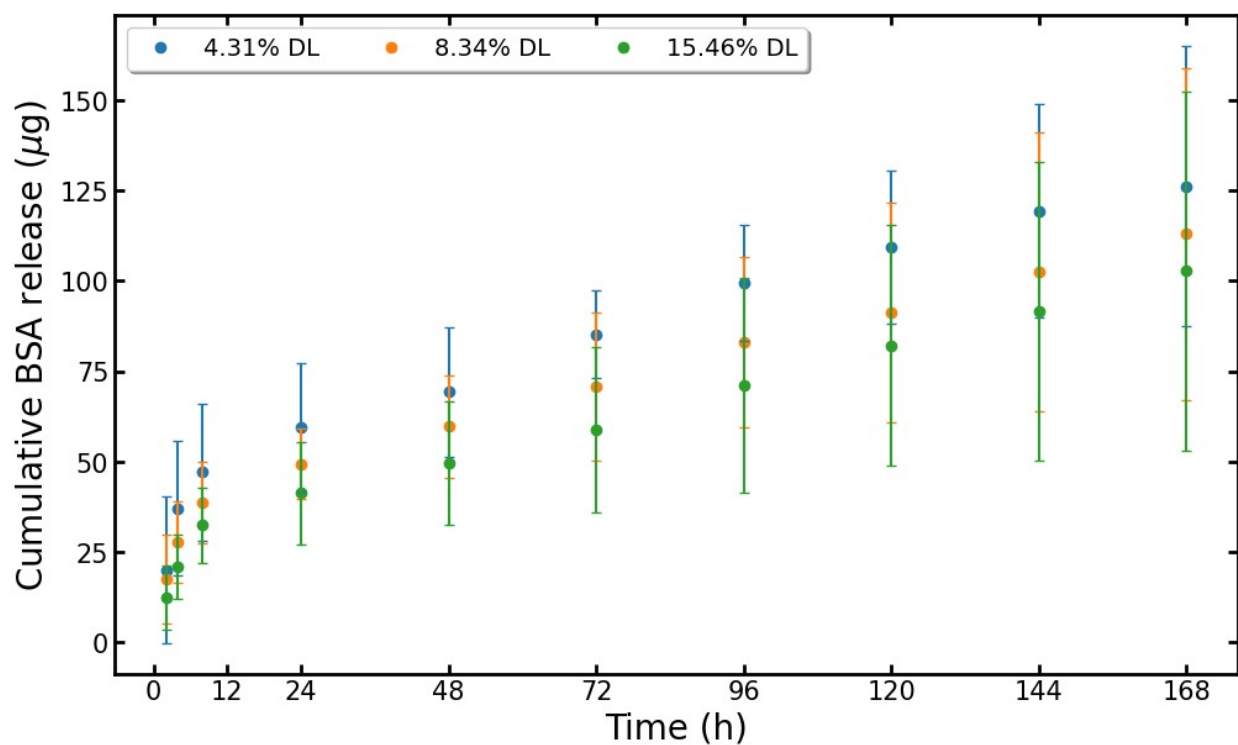

Figure S6. Results for cumulative BSA drug release ( $\mu\text{g}$ ) from BCNPs/P80, calculated using equation (6).

Table S1. Results for particle size and concentration were measured on NTA n=5 for BCNPs prepared at different times. All values reported as an average  $\pm$  standard deviation (STD). The polydispersity index (PDI) was calculated from NTA results using equation (5).

| Preparation BCNPs<br>(Time frame prior to<br>measurement) | Concentration<br>BCNPs<br>(particles/mL) | Particle Size $\pm$ STD<br>(nm) | PDI    |
|-----------------------------------------------------------|------------------------------------------|---------------------------------|--------|
| Fresh                                                     | $8.35 \times 10^7 \pm 1.18 \times 10^7$  | $103.0 \pm 1.5$                 | 0.0002 |
| 2 weeks                                                   | $9.00 \times 10^8 \pm 4.24 \times 10^7$  | $95.2 \pm 4.0$                  | 0.0018 |
| 5 months                                                  | $4.37 \times 10^8 \pm 7.52 \times 10^7$  | $105.8 \pm 4.4$                 | 0.0017 |
| 7 months                                                  | $3.13 \times 10^8 \pm 8.93 \times 10^7$  | $147.4 \pm 6.3$                 | 0.0018 |
